# Supplementary material
Source: PubMed Central journal article supplement (PMC1564221)
Supplement: pnas_0605327103_3.pdf [file pnas_0605327103_3.pdf]

AmpliTaqGold™

Endogenous base

Misincorporation

|   | C  | T | G  | A |
|---|----|---|----|---|
| C |    | 1 |    |   |
| T | 31 |   |    |   |
| G | 1  |   |    | 1 |
| A |    |   | 10 |   |

PlatinumTaqHighFidelity™

Endogenous base

Misincorporation

|   | C  | T  | G  | A  |
|---|----|----|----|----|
| C |    | 10 |    |    |
| T | 35 |    |    |    |
| G |    |    |    | 11 |
| A | 1  | 2  | 11 |    |
